# Supplementary material for: Black garlic melanoidins prevent obesity, reduce serum LPS levels and modulate the gut microbiota composition in high-fat diet-induced obese C57BL/6J mice
Source: Royal Society of Chemistry journal article supplement (doi:10.1039/d0fo02379e), 2020-01-01
Supplement: d0fo02379e1.pdf [file d0fo02379e1.pdf]

Supplementary Table S1. The nutritional ingredient of normal-chow diet and high-fat diet,

respectively

|              | 10%fat (MD12031) | 45%fat (MD12032) |
|--------------|------------------|------------------|
|              | kcal%            | kcal%            |
| protein      | 20               | 20               |
| carbohydrate | 70               | 35               |
| fat          | 10               | 45               |
| total        | 100              | 100              |
| kcal/g       | 3.85             | 4.73             |
