# Supplementary material for: Black garlic melanoidins prevent obesity, reduce serum LPS levels and modulate the gut microbiota composition in high-fat diet-induced obese C57BL/6J mice
Source: Royal Society of Chemistry journal article supplement (doi:10.1039/d0fo02379e), 2020-01-01
Supplement: d0fo02379e2.pdf [file d0fo02379e2.pdf]

Supplementary Table S2. The formula of normal-chow diet and high-fat diet, respectively

|                         | MD12031(10%) | MD12032(45%) |
|-------------------------|--------------|--------------|
| casein                  | 18.96%       | 23.31%       |
| L-cystine               | 0.28%        | 0.35%        |
| corn starch             | 29.86%       | 8.48%        |
| maltodextrin            | 3.32%        | 11.65%       |
| sucrose                 | 33.17%       | 20.14%       |
| cellulose               | 4.74%        | 5.83%        |
| soybean oil             | 2.37%        | 2.91%        |
| lard oil                | 1.90%        | 20.68%       |
| complex mineral         | 4.24%        | 5.23%        |
| decavitamin             | 0.95%        | 1.16%        |
| Choline tartrate        | 0.19%        | 0.23%        |
| Total calories (kcal/g) | 3.85         | 4.73         |
